# Supplementary material
Source: publisher figshare collection journal article supplement (https://tandf.figshare.com/articles/dataset/_/7146152)
Supplement: Supplementary file 1 [file 1]

| **Table S1.** Characteristics of patients with (n=4,703) and without (n=13,582) chemotherapy | | | | |
| --- | --- | --- | --- | --- |
|  | Resected M0  n (%) | Non-resected M0  n (%) | M1  n (%) | P-value |
| Total n-  Total n+ | 1365  1256 | 4748  964 | 7469  2483 |  |
| Gender  Male-  Female-  Male+  Female+ | 732 (54)  633 (46)  671 (53)  585 (47) | 2116 (45)  2632 (55)  516 (54)  448 (46) | 3818 (51)  3651 (49)  1371 (55)  1112 (45) | <0.0001  0.491 |
| Age  <65 years-  65-74 years-  ≥75 years-  <65 years+  65-74 years+  ≥75 years+ | 416 (30)  574 (42)  375 (27)  651 (52)  511 (41)  94 (7) | 762 (16)  1212 (26)  2774 (58)  495 (51)  358 (37)  110 (11) | 1979 (27)  2514 (34)  2976 (40)  1374 (55)  896 (36)  213 (9) | <0.0001  0.001 |
| Location  Head-  Body-  Tail-  Head+  Body+  Tail+ | 1206 (88)  51 (4)  108 (8)  1105 (88)  53 (4)  98 (8) | 4116 (87)  424 (9)  208 (4)  727 (75)  185 (19)  52 (5) | 4392 (59)  1169 (16)  1905 (26)  1252 (50)  502 (20)  729 (29) | <0.0001  <0.0001 |
| Microscopically verified  No-  Yes-  No+  Yes+ | 2 (0)  1363 (100)  0 (0)  1256 (100) | 2798 (59)  1950 (41)  150 (16)  814 (84) | 2809 (38)  4660 (62)  232 (9)  2251 (91) | <0.0001  <0.0001 |
| Tumor size (2015 only)  0 – 2 cm-  >2 – 4 cm-  >4 cm-  Unknown-  0 – 2 cm+  >2 – 4 cm+  >4 cm+  Unknown+ | 36 (30) 66 (54) 17(14) 3(2)  40 (20)  132 (66)  24 (12)  3 (2) | 41 (12) 169 (48) 94 (26) 51 (14)  8 (7)  62 (52)  37 (31)  13 (11) | 43 (6)  259 (37)  254 (36)  153 (22)  24 (8)  121 (38)  119 (38)  52 (16) | <0.0001  <0.0001 |

- Patients without chemotherapy treatment

+ Patients with chemotherapy treatment
